# Supplementary material
Source: PubMed Central journal article supplement (PMC7876669)
Supplement: NIHMS1636269-supplement-Supplemental_Digital_Content_1.pdf [file NIHMS1636269-supplement-Supplemental_Digital_Content_1.pdf]

## Supplemental Digital Content 1

### Focus Group and Interview Discussion Guide

\*Questions 2-6 were asked only of participants enrolled in a Health Home.

1. Icebreaker- [Going around the room...]
  - Your first name or what name you would like us to call you
  - If you had a super power, what would it be?
2. Do you understand what is a Health Home?\*
3. What is your understanding of being in a Health Home?\*
4. What is your experience of being in a Health Home?\* **(prompts: benefits, challenges, annoyance)**
5. Who does a Health Home benefit?\*
6. Has your life changed since becoming part of a Health Home?\* (if so how?)
7. What are some challenges to being healthy? **(prompts: stressors, lack of support, difficulty making appointments?)**
8. What challenges/barriers have you experienced in managing your type 2 diabetes? **(prompts: access to care, access to medicines, cost of supplies, access to healthy foods, cost)**
9. Do you have your own personal doctor that you see to get your healthcare needs taken care of?
10. What makes it easy to take your medicines the way they are prescribed? **(prompts: timing, pill boxes, and trust in your doctor)**
11. What makes it hard to take your medicines the way they are prescribed? **(prompts: forget to refill, cost of medicine or not enough money)**
12. In the past, how have different professionals or providers talked with you about healthy eating and nutrition? **(prompts: like a doctor, nutritionist, or social worker)**
13. What makes it easy for you to eat healthy? **(prompts: yummy, my kids like it)**
14. What makes it hard for you to eat healthy? **(prompts: too expensive, lack of access)**
15. What gets in the way of you being healthy? **(prompts: stressors, lack of support, difficulty making appointments?)**
16. Do you know what an outcome means? **(prompt: outcome means: The way a thing turns out; like a consequence, result)**

**Give study description and plans**

17. What do you think of our study?

18. What do you think about what we want to learn more about?

19. What other outcomes do you think are important for us to study?

20. Which of the outcomes we've talked about do you think are most important?

21. What is the best way to share what we learn with people like you?

22. Are there other things you'd like to share with us?
